# Supplementary material for: Randomized controlled trial of early arachidonic acid and docosahexaenoic acid enteral supplementation in very preterm infants
Source: Frontiers journal article supplement (doi:10.3389/fped.2022.947221), 2022-08-25

## *Supplementary Material*

**Table S1.** Oligonucleotides for single nucleotide polymorphisms (SNPs) detection of *FADS1* gene.

| SNPs     | Primer    | Sequence             |
|----------|-----------|----------------------|
| rs174545 | Forward   | CCCCAATACCACAGTCTTGA |
|          | Reverse C | GCTTCTCCATCCTCATTTGC |
|          | Reverse G | CCTTCTCCATCCTCATTTGC |
| rs174546 | Forward C | TCAAGCTCCCCTCTGCC    |
|          | Forward T | TCAAGCTCCCCTCTGCT    |
|          | Reverse   | GACATGTAGGGTGGGGAGTG |

**Table S2.** Enteral nutritional status of premature neonates according to ARA:DHA group supplementation.

|                                 | <b>80:40 group</b>  | <b>120:60 group</b>  | <b>P</b> |
|---------------------------------|---------------------|----------------------|----------|
| Maternal own milk (ml/kg/day)   |                     |                      |          |
| At 7 days                       | 54.2 [15.4; 66.5]   | 53.6 [32.6; 144.0]   | 0.27     |
| At 28 days                      | 130.0 [0.0; 153.0]  | 131.0 [111.0; 154.0] | 0.45     |
| At 36 WPA                       | 130.0 [88.4; 145.0] | 87.5 [20.4; 153.0]   | 0.83     |
| Maternal donor milk (ml/kg/day) |                     |                      |          |
| At 7 days                       | 0.0 [0.0; 41.2]     | 0.0 [0.0; 37.1]      | 0.77     |
| At 28 days                      | 0.0 [0.0; 14.4]     | 0.0 [0.0; 43.7]      | 0.51     |
| At 36 WPA                       | -                   | -                    | -        |
| Formula (ml/kg/day)             |                     |                      |          |
| At 7 days                       | -                   | -                    | -        |
| At 28 days                      | 0.0 [0.0; 25.9]     | 0.0 [0.0; 0.0]       | 0.20     |
| At 36 WPA                       | 0.0 [0.0; 59.0]     | 0.0 [0.0; 0.0]       | 0.38     |

Data shown median and interquartile range [Q1; Q3]. The p-value (P) was extracted from U Mann–Whitney test. Weeks postmenstrual age (WPA).

**Table S3.** Plasma fatty acids levels according to ARA:DHA group supplementation.

| <b>Fatty acids (%nmol)</b>                              | <b>80:40 group</b> | <b>120:60 group</b> | <b>P</b> |
|---------------------------------------------------------|--------------------|---------------------|----------|
| <b>Linoleic acid (LA)</b>                               |                    |                     |          |
| At birth                                                | 9.75 [7.25; 14.0]  | 11.3 [9.57; 12.0]   | 0.97     |
| At 21 days                                              | 17.9 [17.0; 18.5]  | 14.6 [10.7; 17.0]   | 0.07     |
| At 36 WPA                                               | 19.7 [17.2; 24.1]  | 19.8 [18.3; 20.9]   | 0.97     |
| <b>Dihomo-<math>\gamma</math>-linolenic acid (DGLA)</b> |                    |                     |          |
| At birth                                                | 1.18 [1.13; 1.41]  | 1.29 [1.13; 1.87]   | 0.51     |
| At 21 days                                              | 1.46 [1.36; 1.52]  | 1.49 [1.35; 1.74]   | 0.63     |
| At 36 WPA                                               | 1.43 [1.12; 1.47]  | 1.17 [1.08; 1.72]   | 0.97     |
| <b>Arachidonic acid (ARA)</b>                           |                    |                     |          |
| At birth                                                | 6.43 [5.04; 7.24]  | 5.95 [4.28; 6.60]   | 0.45     |
| At 21 days                                              | 6.48 [5.65; 6.68]  | 7.49 [5.78; 7.90]   | 0.20     |
| At 36 WPA                                               | 6.07 [4.96; 7.39]  | 7.42 [5.66; 8.42]   | 0.20     |
| <b><math>\alpha</math>-Linolenic acid (ALA)</b>         |                    |                     |          |
| At birth                                                | 0.00 [0.00; 0.00]  | 0.00 [0.00; 0.00]   | 0.81     |
| At 21 days                                              | 0.00 [0.00; 0.29]  | 0.00 [0.00; 0.37]   | 0.73     |
| At 36 WPA                                               | 0.31 [0.00; 0.45]  | 0.00 [0.00; 0.44]   | 0.41     |
| <b>Eicosapentaenoic acid (EPA)</b>                      |                    |                     |          |
| At birth                                                | 0.40 [0.25; 0.56]  | 0.26 [0.00; 0.57]   | 0.62     |
| At 21 days                                              | 0.23 [0.00; 0.56]  | 0.76 [0.22; 0.82]   | 0.11     |
| At 36 WPA                                               | 0.20 [0.00; 0.32]  | 0.33 [0.23; 0.50]   | 0.23     |
| <b>Docosahexaenoic acid (DHA)</b>                       |                    |                     |          |
| At birth                                                | 1.52 [1.07; 1.82]  | 1.37 [1.17; 1.93]   | 0.69     |
| At 21 days                                              | 1.15 [0.90; 1.38]  | 1.43 [1.28; 1.61]   | 0.17     |
| At 36 WPA                                               | 1.27 [1.21; 1.40]  | 1.42 [1.22; 1.58]   | 0.51     |
| <b>ARA:DHA</b>                                          |                    |                     |          |
| At birth                                                | 4.22 [3.86; 4.79]  | 3.39 [3.00; 5.79]   | 0.23     |
| At 21 days                                              | 5.36 [4.69; 6.23]  | 5.15 [3.05; 6.08]   | 0.51     |
| At 36 WPA                                               | 4.60 [3.89; 5.76]  | 5.84 [5.20; 6.91]   | 0.20     |

Data shown median and interquartile range [Q1; Q3]. The p-value (P) was extracted from U Mann–Whitney test. Weeks postmenstrual age (WPA).

**Table S4.** Omega-6 LCPUFAs derived oxylipin levels according to ARA:DHA group supplementation.

| Oxylipins (ng/ml) | 80:40 group       | 120:60 group      | P            |                       | 80:40 group       | 120:60 group      | P    |
|-------------------|-------------------|-------------------|--------------|-----------------------|-------------------|-------------------|------|
| 9(10)-EpHOME      |                   |                   |              | 12-HETE               |                   |                   |      |
| At birth          | 4.42 [4.35; 5.06] | 2.33 [1.81; 3.50] | 0.09         | At birth              | 159 [112; 180]    | 103 [33.9; 139]   | 0.17 |
| At 21 days        | 5.61 [3.71; 6.48] | 4.66 [2.50; 5.56] | 0.52         | At 21 days            | 390 [115; 861]    | 337 [154; 493]    | 0.90 |
| At 36 WPA         | 4.33 [3.25; 6.93] | 4.79 [4.67; 7.67] | 0.52         | At 36 WPA             | 160 [154; 329]    | 224 [49.8; 632]   | 0.75 |
| 9-OXOOODE         |                   |                   |              | 15-HETE               |                   |                   |      |
| At birth          | 54.6 [19.3; 62.4] | 22.6 [18.1; 38.3] | 0.22         | At birth              | 35.2 [25.1; 43.1] | 18.3 [13.1; 22.2] | 0.09 |
| At 21 days        | 58.8 [28.1; 124]  | 37.3 [25.3; 50.3] | 0.52         | At 21 days            | 13.8 [8.43; 18.6] | 19.3 [11.1; 33.1] | 0.44 |
| At 36 WPA         | 56.3 [23.3; 103]  | 64.7 [41.5; 103]  | 0.75         | At 36 WPA             | 16.0 [12.9; 17.0] | 13.3 [7.72; 25.8] | 0.75 |
| 13-HODE           |                   |                   |              | 5,6-EET               |                   |                   |      |
| At birth          | 88.5 [41.5; 97.2] | 45.8 [41.1; 69.9] | 0.47         | At birth              | 3.30 [2.37; 4.09] | 3.11 [1.93; 7.40] | 0.94 |
| At 21 days        | 115 [61.1; 218]   | 64.1 [49.1; 99.3] | 0.20         | At 21 days            | 4.07 [2.51; 4.58] | 3.54 [2.27; 6.47] | 0.90 |
| At 36 WPA         | 106 [60.2; 137]   | 110 [73.7; 137]   | 0.63         | At 36 WPA             | 6.56 [4.00; 8.52] | 3.70 [1.43; 6.10] | 0.26 |
| 12,13-DiHOME      |                   |                   |              | 8,9-EET               |                   |                   |      |
| At birth          | 1.19 [1.16; 1.43] | 1.13 [0.99; 1.25] | 0.57         | At birth              | 9.83 [4.76; 13.0] | 3.18 [2.88; 5.48] | 0.12 |
| At 21 days        | 1.01 [0.70; 2.03] | 0.85 [0.76; 1.00] | 0.61         | At 21 days            | 5.27 [2.79; 8.38] | 4.67 [3.63; 6.29] | 0.80 |
| At 36 WPA         | 0.85 [0.79; 0.98] | 0.71 [0.63; 0.84] | 0.34         | At 36 WPA             | 3.70 [2.48; 4.75] | 5.15 [2.48; 7.68] | 0.52 |
| 5-HETE            |                   |                   |              | 11,12-EET             |                   |                   |      |
| At birth          | 148 [146; 163]    | 93.6 [81.8; 113]  | <b>0.012</b> | At birth              | 0.97 [0.64; 2.60] | 0.97 [0.69; 1.09] | 0.81 |
| At 21 days        | 101 [70.2; 155]   | 114 [91.4; 147]   | 0.80         | At 21 days            | 1.17 [0.96; 1.69] | 2.63 [1.46; 3.69] | 0.12 |
| At 36 WPA         | 117 [64.4; 136]   | 161 [123; 192]    | 0.34         | At 36 WPA             | 1.47 [0.82; 2.43] | 0.98 [0.83; 1.37] | 0.63 |
| 8-HETE            |                   |                   |              | 14,15-EET             |                   |                   |      |
| At birth          | 20.9 [12.2; 23.4] | 9.72 [6.89; 11.9] | 0.09         | At birth              | 26.9 [25.4; 37.9] | 14.5 [12.6; 21.0] | 0.09 |
| At 21 days        | 11.0 [5.02; 15.4] | 9.82 [8.83; 15.2] | 0.52         | At 21 days            | 13.4 [11.8; 14.5] | 23.7 [16.1; 27.1] | 0.37 |
| At 36 WPA         | 8.53 [5.42; 8.98] | 10.0 [5.09; 15.0] | 0.63         | At 36 WPA             | 19.5 [12.0; 30.6] | 12.7 [11.8; 21.1] | 0.75 |
| 9-HETE            |                   |                   |              | Thromboxane B2 (TXB2) |                   |                   |      |
| At birth          | 23.9 [13.7; 26.6] | 12.0 [9.21; 13.4] | 0.09         | At birth              | 3.36 [2.56; 41.0] | 2.30 [1.37; 5.38] | 0.29 |
| At 21 days        | 21.6 [9.27; 37.2] | 18.8 [14.1; 25.2] | 0.90         | At 21 days            | 9.99 [4.69; 24.9] | 5.17 [3.50; 7.04] | 0.37 |
| At 36 WPA         | 16.5 [9.60; 21.7] | 15.7 [8.96; 28.2] | 0.99         | At 36 WPA             | 5.52 [4.15; 12.5] | 13.9 [5.42; 34.2] | 0.34 |
| 11-HETE           |                   |                   |              |                       |                   |                   |      |
| At birth          | 123 [83.4; 130]   | 46.0 [42.4; 83.3] | 0.12         |                       |                   |                   |      |
| At 21 days        | 44.5 [28.4; 75.0] | 58.0 [41.1; 86.6] | 0.37         |                       |                   |                   |      |
| At 36 WPA         | 49.7 [26.1; 56.7] | 49.9 [30.7; 76.8] | 0.52         |                       |                   |                   |      |

Data shown median and interquartile range [Q1; Q3]. The p-value (P) was extracted from U Mann–Whitney test. Weeks postmenstrual age (WPA). In bold is shown P<0.05.

**Table S5.** Omega-3 LCPUFAs derived oxylipin levels according to ARA:DHA group supplementation.

| Oxylipins (ng/ml) | 80:40 group       | 120:60 group      | P            |
|-------------------|-------------------|-------------------|--------------|
| 9s-HOTRE          |                   |                   |              |
| At birth          | 6.53 [2.93; 9.80] | 2.59 [1.27; 4.51] | 0.09         |
| At 21 days        | 4.66 [3.10; 6.90] | 3.64 [2.88; 6.18] | 0.70         |
| At 36 WPA         | 3.81 [3.01; 7.41] | 6.19 [2.82; 8.28] | 0.75         |
| 18-HEPE           |                   |                   |              |
| At birth          | 7.60 [0.60; 8.21] | 1.19 [0.90; 3.83] | 0.57         |
| At 21 days        | 1.39 [0.52; 2.49] | 1.67 [0.78; 2.91] | 0.80         |
| At 36 WPA         | 0.39 [0.22; 0.64] | 0.64 [0.48; 2.07] | 0.42         |
| 4-HDHA            |                   |                   |              |
| At birth          | 14.2 [10.5; 16.7] | 9.49 [9.09; 11.3] | <b>0.028</b> |
| At 21 days        | 10.0 [8.69; 11.9] | 9.45 [8.94; 17.0] | 0.90         |
| At 36 WPA         | 8.31 [6.84; 8.58] | 13.6 [10.9; 15.8] | <b>0.025</b> |
| 7-HDHA            |                   |                   |              |
| At birth          | 4.03 [2.69; 5.78] | 3.07 [1.31; 3.36] | 0.22         |
| At 21 days        | 1.93 [1.00; 2.28] | 1.07 [0.45; 2.02] | 0.44         |
| At 36 WPA         | 1.72 [0.72; 1.86] | 2.16 [1.80; 3.17] | 0.15         |
| 14-HDHA           |                   |                   |              |
| At birth          | 13.2 [4.35; 63.1] | 16.6 [8.07; 20.3] | 0.81         |
| At 21 days        | 8.25 [6.90; 14.5] | 13.0 [8.30; 27.1] | 0.25         |
| At 36 WPA         | 8.44 [5.75; 15.0] | 18.6 [15.5; 31.7] | 0.08         |
| 19,20-EPDPA       |                   |                   |              |
| At birth          | 1.68 [1.55; 2.50] | 1.20 [0.82; 1.68] | 0.12         |
| At 21 days        | 1.81 [0.91; 2.29] | 1.66 [1.01; 1.84] | 0.30         |
| At 36 WPA         | 0.81 [0.42; 1.66] | 1.68 [1.22; 2.43] | 0.34         |

Data shown median and interquartile range [Q1; Q3]. The p-value (P) was extracted from U Mann–Whitney test. Weeks postmenstrual age (WPA). In bold is shown P<0.05.

**Table S6.** Neonatal anthropometric parameters according to ARA:DHA group supplementation.

| <b>Anthropometry</b>    | <b>80:40 group</b> | <b>120:60 group</b> | <b>P</b> |
|-------------------------|--------------------|---------------------|----------|
| Weight (g)              |                    |                     |          |
| At birth                | 1063 [940; 1412]   | 1210 [1086; 1468]   | 0.48     |
| At 21 days              | 1334 [1193; 1597]  | 1360 [1212; 1775]   | 0.78     |
| At 36 WPA               | 2255 [1905; 2336]  | 2350 [2088; 2372]   | 0.56     |
| Length (cm)             |                    |                     |          |
| At birth                | 36.2 [34.4; 40.1]  | 38.5 [36.5; 39.2]   | 0.42     |
| At 21 days              | 40.0 [37.0; 42.8]  | 39.5 [38.0; 43.0]   | 0.73     |
| At 36 WPA               | 43.8 [43.1; 44.0]  | 44.0 [42.5; 45.0]   | 0.45     |
| Head circumference (cm) |                    |                     |          |
| At birth                | 25.0 [22.6; 26.8]  | 27.0 [25.0; 27.8]   | 0.14     |
| At 21 days              | 27.2 [26.1; 28.6]  | 28.0 [26.8; 29.2]   | 0.55     |
| At 36 WPA               | 31.5 [30.8; 32.8]  | 32.4 [31.6; 32.9]   | 0.56     |

Data shown median and interquartile range [Q1; Q3]. The p-value (P) was extracted from U Mann–Whitney test. Weeks postmenstrual age (WPA).

**Figure S1.** Effect of rs174545 and rs174546 SNPs on plasma ARA and DHA levels, and ARA:DHA ratio at 36 week of postmenstrual age according to ARA:DHA group supplementation. Data shown median and interquartile range [Q1; Q3]. The p-value (P) was extracted from U Mann–Whitney test in those cases where a comparison was possible.

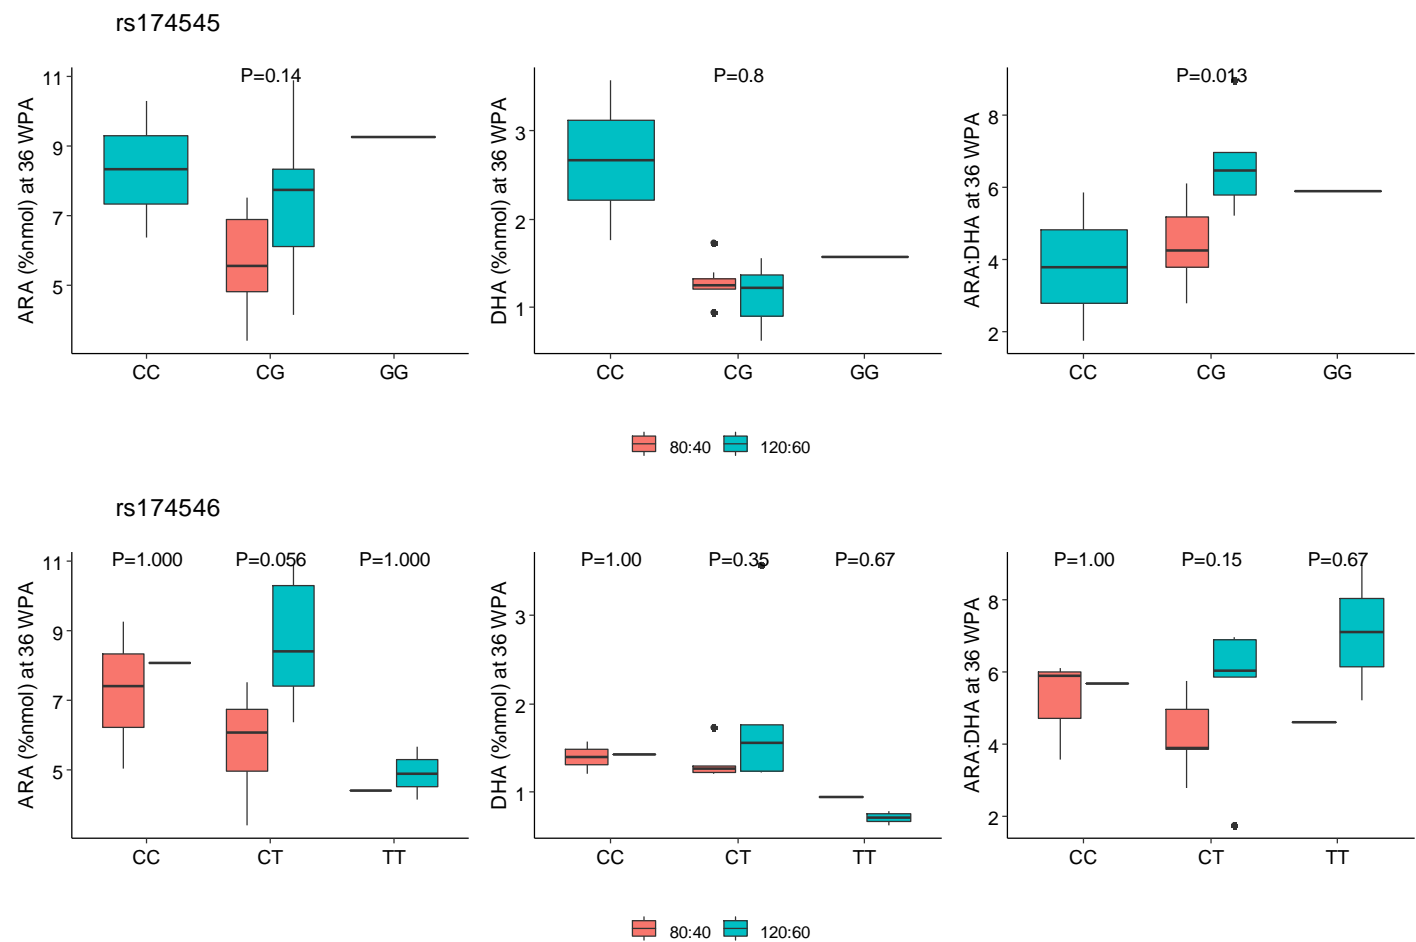

Supplement: Data_Sheet_1.PDF [file Data_Sheet_1.PDF]
